# Supplementary material for: Role of AlN intermediate layer in the morphological evolution of GaN nanorods grown on c-plane sapphire
Source: Royal Society of Chemistry journal article supplement (doi:10.1039/c3ce42528b), 2014-01-01
Supplement: c3ce42528b.pdf [file c3ce42528b.pdf]

We have mentioned in the text page number-7 and line-9 to 11 corresponds to that the formation of GaN layer is confirmed by XPS and EDAX [supplementary information S1].

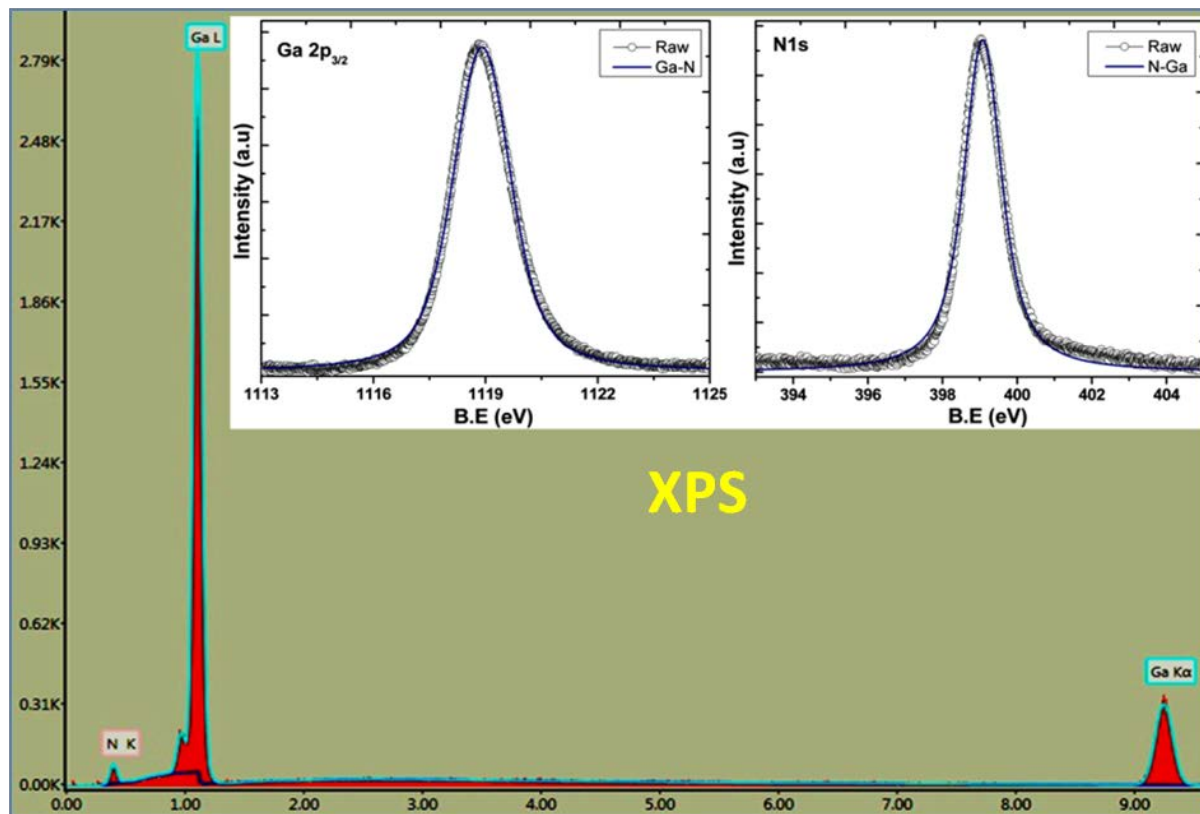

**Fig.(a)** EDAX and XPS spectra taken for sample (C)
